# Supplementary material for: Singular supramolecular self-assembling of bis-cyclodextrinyl-bis-lariat hosts with metal bis-aryl-sulfonates as guests
Source: Royal Society of Chemistry journal article supplement (doi:10.1039/c5nj02327k), 2015-11-16
Supplement: c5nj02327k1.pdf [file c5nj02327k1.pdf]

## Singular Supramolecular Self-assembly of Bis-Cyclodextrinyl-Bis-Lariat Hosts with Bis-Aryl-Sulfonates as Guests

Florence Dumarçay-Charbonnier, \* Jean Pierre Joly and Alain Marsura\*

UMR CNRS 7565 SRS MC Faculté des Sciences et Technologies. Université de Lorraine, BP70239, 54506 Vandœuvre-lès-Nancy, France. E-mail: [alain.marsura@univ-lorraine.fr](mailto:alain.marsura@univ-lorraine.fr); Tel :+33683684955

## Supporting Information

### 1. General procedures

### 2. Characterization of the products

### 3. NMR Spectra

#### 1. General procedures

Chemicals and solvents (reagent grade or better) were purchase from Sigma-Aldrich. Anhydrous solvents were dried by usual procedures and stored over 4Å molecular sieves under Ar before use. Chromatography was carried out using Grace silicagel. <sup>1</sup>H and <sup>13</sup>C-NMR spectra were recorded on a Bruker DRX 400 FT-NMR spectrometer at 400MHz for <sup>1</sup>H and 100 MHz for <sup>13</sup>C. Chemicals shifts δ were reported in parts per million (ppm), calibrated to the residual solvent peak set, with coupling constants reported in Hertz (Hz). High Resolution Electrospray (HR-ESIMS) and (MALDI-TOF) Mass spectra were recorded on a Bruker MicroQ-TOF and a Bruker Daltonics Reflex IV spectrometer respectively. FT-IR spectra were obtained from KBr pellets on a perkin Elmer Spectrum 1000 photometer.

Zn<sup>II</sup>, Cu<sup>II</sup> and Ca<sup>II</sup> bis-tosylates, Zn<sup>II</sup> and Cu<sup>II</sup> bis-sulfanilate salts were obtained by a slightly modified method of the literature.<sup>8</sup> Synthesis of the chiral bis-β-cyclodextrinyl-diazacrown receptor see.<sup>6</sup> Synthesis of the achiral bis-β-cyclodextrinyl-diazacrown receptor see.<sup>7</sup>

#### General procedure for pseudo-rotaxane preparation

1 equiv. of metal bis-tosylate or bis-sulfanilate salt is added to 1 equiv. of dimer **1**, **2** or **3** in water (3mL) at r.t. The solution is stirred overnight at r. t., evaporated to dryness and then lyophilised.

#### 2. Characterization of the products

[bis-triazolo-peracetylated-β-cyclodextrinyl]-diazacrown **6**

To a stirred solution of *N,N'*-bis-propargyl-diazacrown **5** (17 mg, 1,47 mmol, 338.44 g.mol<sup>-1</sup>) in CH<sub>2</sub>Cl<sub>2</sub> at r.t. are added mono-azido peracetylated β-cyclodextrin (100 mg, 2000.80 g.mol<sup>-1</sup>, 2.1 equiv.), Na-ascorbate (4 mg, 0.4 equiv.) and CuSO<sub>4</sub>·5 H<sub>2</sub>O (2.5mg, 0.2 equiv.) under argon. The yellow pale mixture is stirred overnight and evaporated. The crude material is purified by chromatography on silicagel with CH<sub>2</sub>Cl<sub>2</sub>/MeOH gradient as eluent. The final product is obtained as a white powder in 65% yield. <sup>1</sup>H NMR (400MHz, CDCl<sub>3</sub>, 298K): δ= 8.01 (s, 2H; Triazol H), 5.47 (s, 2H; H<sub>1</sub>), 5.30-5.40 (m, 7H ; H<sub>2</sub>,

H<sub>3</sub>, H<sub>4</sub>, H<sub>5</sub>, H<sub>6</sub>, H<sub>6</sub>), 3.90-3.75 (m; CH<sub>2</sub> crown), 3.70-3.40 (m; H<sub>4</sub>, CH<sub>2</sub> crown), 2.70 (bs, 2H; CH<sub>2</sub> triazol), 2.10-1.90 (m, 80H; CH<sub>3</sub>-CO). <sup>13</sup>C NMR (100MHz, CDCl<sub>3</sub>, 298K): δ=170.7-170.6-170.5-169.3 (CH<sub>3</sub>CO), 144.1 (CH<sub>2</sub>-C=C-N triazol), 126.2 (CH<sub>2</sub> triazol) 97 (C1), 77 (C4), 70.3-70.6-69.6-69.5-69.3 (C2, C3, C5), 68 (CH<sub>2</sub> crown), 62.8-62.6-62.4-62.2 (C6), 53.3 (N-CH<sub>2</sub>-C=C triazol), 50 (CH<sub>2</sub> crown), 48.9 (C6'), 29.7 (CH<sub>2</sub> crown), 20.7 (CH<sub>3</sub>-CO).

[bis-triazolo-β-cyclodextrinyl]-diazacrown **3**

NH<sub>3</sub> is bubbling during 3 hours through a solution of **6** (0.120mg, 0.0278 mmol, 4339.9 g.mol<sup>-1</sup>) in anhyd. MeOH. The solution is stirred into the MeOH /NH<sub>3</sub> saturated solution during 2 or 3 days. The mixture is then evaporated to dryness, lyophilised to give **3** in a quantitative yield as flocculent white solid. <sup>1</sup>H NMR (400MHz, D<sub>2</sub>O, 298K): δ=7.93 (s, 2H, TriazolH), 5.10 (s, 2H; CH<sub>2</sub> crown), 5.00 (s, 14H; H<sub>1</sub>), 4.98 (b s; CH<sub>2</sub> crown), 4.65-4.55 (m, 2H; CH<sub>2</sub> crown), 4.00-3.35 (m, 84H; H<sub>2</sub>, H<sub>3</sub>, H<sub>4</sub>, H<sub>5</sub>, H<sub>6</sub>, H<sub>6</sub>), 3.20-3.10 (m; CH<sub>2</sub> crown), 3.10-3.00 (m; CH<sub>2</sub> crown), 2.85-2.70 (m; CH<sub>2</sub> crown), 2.71 (s, 4H; CH<sub>2</sub> triazol). <sup>13</sup>C NMR (100MHz, D<sub>2</sub>O, 298K): δ=126.9 (CH<sub>2</sub> triazol), 102.1 (C1), 81.1 (C4), 73.1-72.1-71.9 (C2, C3, C5), 69.7 (C6), 60.1 (C6'), 52.3 (CH<sub>2</sub> triazol), 51 (CH<sub>2</sub> crown), 47.6 (CH<sub>2</sub> triazol), 44.7 (CH<sub>2</sub> crown), 25.1 (CH<sub>2</sub> crown). ESIMS: *m/z*: 1329.49 [M/2+1H<sup>+</sup>].

Pseudo-[2]rotaxane **7**

[bis-β-cyclodextrinyl]-diazacrown dimer **1** (50mg, 0,019 mmol, M = 2582,33 g.mol<sup>-1</sup>). Zn<sup>II</sup> *p*-tosylate (7,91 mg, 1,94.10<sup>-2</sup> mmol, M=407,78 g.mol<sup>-1</sup>). **7** was obtained quantitatively as a pale white flocculent solid. IR (KBr): ν =3300 (OH), 2950 (CH-), 2500 (CH arom.), 1637 (C=O urea) cm<sup>-1</sup>. <sup>1</sup>H NMR (400MHz, D<sub>2</sub>O, 298K): δ=7.60 (d, <sup>3</sup>J (H,H)=8Hz, 4H; Har), 7.25 (d, <sup>3</sup>J (H,H)=8Hz, 4H; Har), 5.30 (s, 4H; H<sub>1</sub>), 5.14 (d, <sup>3</sup>J (H,H) = 4Hz, 1H; CH<sub>2</sub> crown), 4.94 (bs, 7H; H<sub>1</sub>), 4.57-4.52 (m, 1H; CH<sub>2</sub> crown), 4.05-3.91 (m, 4H; CH<sub>2</sub> crown), 3.90-3.81 (m, 6H; CH<sub>2</sub> crown), 3.78-3.41 (m, 84H; H<sub>2</sub>, H<sub>3</sub>, H<sub>4</sub>, H<sub>5</sub>, H<sub>6</sub>, H<sub>6</sub>), 3.41-3.10 (m, 8H; CH<sub>2</sub> crown). <sup>13</sup>C NMR (100MHz, D<sub>2</sub>O, 298K): δ=160.6 (C=O; urea), 142.0 (q), 140.0 (q), 129.1 (CH arom.), 125.3 (CH arom.), 101.9 (C1), 99.5 (C1), 95.8 (CH<sub>2</sub> crown), 92.0 (CH<sub>2</sub> crown), 83.3 (CH<sub>2</sub> crown), 76.6 (CH<sub>2</sub> crown), 75.9-73.2-71.8 (C2, C3, C5), 69.6 (C6) 65.0 (CH<sub>2</sub> crown), 62.5 (CH<sub>2</sub> crown), 60.4 (C6'), 48.6 (CH<sub>2</sub> crown), 44.6 (CH<sub>2</sub> crown), 34.5 (CH<sub>2</sub> crown), 20.5 (CH<sub>3</sub>Ph). Maldi-TOF [C<sub>112</sub>H<sub>178</sub>N<sub>4</sub>O<sub>80</sub>S<sub>2</sub>Zn: 2986.87u.m.a.], 2582.55 [M- Zn(OTs)<sub>2</sub>]

### Pseudo-[2]rotaxane 8

[bis- $\beta$ -cyclodextrinyl]-diaz-[18-6]-crown dimer **1** (50mg, 0,019 mmol, M = 2582,33 g.mol<sup>-1</sup>). Cu<sup>II</sup> *p*-tosylate (7,87mg, 1,93.10<sup>-2</sup> mmol, M=405,93 g.mol<sup>-1</sup>). **8** was obtained quantitatively as a pale green flocculent solid. IR (KBr):  $\nu$  = 3300 (OH) 2950 (CH-) 2500 (CH arom.), 1637 (C=O urea) cm<sup>-1</sup>. <sup>1</sup>H NMR (400MHz, D<sub>2</sub>O, 298K):  $\delta$ =7.60 (d, <sup>3</sup>J(H,H)=8Hz, 4H; Har), 7.24 (d, <sup>3</sup>J(H,H)=8Hz, 4H; Har), 5.30 (bs, 4H; H1), 5.13 (s, 1H; CH<sub>2</sub>-crown), 4.94 (s, 7H; H<sub>1</sub>), 4.57 (m, 2H; CH<sub>2</sub> crown), 4.05-3.38 (m, 92H; H<sub>2</sub>, H<sub>3</sub>, H<sub>4</sub>, H<sub>5</sub>, H<sub>6</sub>, CH<sub>2</sub> crown), 3.38-3.09 (m, 8H; CH<sub>2</sub> crown), 2.26 (s, 6H; CH<sub>3</sub>-Ph). <sup>13</sup>C NMR (100MHz, D<sub>2</sub>O, 298K):  $\delta$ =160.7 (C=O urea), 142.0 (q), 140.12 (q), 129.1 (CH arom.), 125.3 (CH arom.), 101.9 (C1), 99.5 (C1), 95.8 (CH<sub>2</sub> crown), 95.7 (CH<sub>2</sub> crown), 91.8 (CH<sub>2</sub> crown), 83.3 (CH<sub>2</sub> crown), 80.9 (C4), 76.8 (C2), 76.1 (CH<sub>2</sub> crown), 74.5-74.1-73.9 (CH<sub>2</sub> crown), 73.3 (C3), 72.8-72.7 (CH<sub>2</sub> crown), 71.8 (C5), 69.6 (C6), 67.2 (CH<sub>2</sub> crown), 60.4 (C6'), 48.6-47.1, 44.7 (CH<sub>2</sub> crown), 20.5 (CH<sub>3</sub>) Maldi-TOF [C<sub>112</sub>H<sub>178</sub>CuN<sub>4</sub>O<sub>80</sub>S<sub>2</sub>: 2985.87 u.m.a.]: 2645.908 [M-Cu(OTs)<sub>2</sub>+Cu], 2582.897 [M-Cu(OTs)<sub>2</sub>].

### Pseudo-[2]rotaxane 9

[bis- $\beta$ -cyclodextrinyl]-diaz-[18-6]-crown dimer **1** (50mg, 0,019 mmol, M = 2582,33 g.mol<sup>-1</sup>). Ca<sup>II</sup> *p*-tosylate (7,42 mg, 1,94.10<sup>-2</sup> mmol, M=382,47 g.mol<sup>-1</sup>). **9** was obtained quantitatively as a pale white flocculent solid. <sup>1</sup>H NMR (400MHz, D<sub>2</sub>O, 298K)  $\delta$ =7.62 (d, <sup>3</sup>J(H,H)=8Hz, 4H; Har), 7.29 (d, <sup>3</sup>J(H,H)=8Hz, 4H; Har), 5.33 (s, 4H, CH<sub>2</sub> crown), 5.17 (d, <sup>3</sup>J(H,H)=4Hz, 1H; CH<sub>2</sub> crown), 4.97 (bs, 7 H; H1), 4.58-4.55 (m, 1H; CH<sub>2</sub> crown), 4.18-3.92 (m, 4H; CH<sub>2</sub> crown), 3.84-3.45 (m, 84H; H<sub>2</sub>, H<sub>3</sub>, H<sub>4</sub>, H<sub>5</sub>, H<sub>6</sub>, H<sub>6</sub>), 3.44-3.13 (m, 8H; CH<sub>2</sub> crown). <sup>13</sup>C NMR (100MHz, D<sub>2</sub>O, 298K):  $\delta$ =160.6 (C=O urea), 142.0 (q), 140.0 (q), 129.1(CH arom.), 125.3 (CH arom.), 101.9 (C1), 99.5 (CH<sub>2</sub> crown), 95.8 (CH<sub>2</sub> crown), 92.0 (CH<sub>2</sub> crown), 83.3 (CH<sub>2</sub> crown), 76.6 (CH<sub>2</sub> crown), 75.9-73.2-71.8 (C2, C3, C5), 69.6 (C6) 65.0 (CH<sub>2</sub> crown), 62.5 (CH<sub>2</sub> crown), 60.4 (C6'), 48.6 (CH<sub>2</sub> crown), 44.6 (CH<sub>2</sub> crown), 34.5 (CH<sub>2</sub> crown), 20.5 (CH<sub>3</sub>). Maldi-TOF [C<sub>112</sub>H<sub>178</sub>CaN<sub>4</sub>O<sub>80</sub>S<sub>2</sub>: 2962.91u.m.a.]: 2582.55 [M-Ca(OTs)<sub>2</sub>].

### Pseudo-rotaxane 10

[bis- $\beta$ -cyclodextrinyl]-diaz-[18-6]-crown dimer **2** (50mg, 0,019 mmol, M = 2670.44 g.mol<sup>-1</sup>). Zn<sup>II</sup> *p*-tosylate (7.62 mg, 1,86.10<sup>-2</sup> mmol, M=407.78 g.mol<sup>-1</sup>). **10** was obtained quantitatively as a white flocculent solid. IR (KBr):  $\nu$  = 3300 (OH), 2950 (CH-), 2500 (CHar), 1637 (C=O urea) cm<sup>-1</sup>. <sup>1</sup>H NMR (400MHz, D<sub>2</sub>O, 298K):  $\delta$ =7.61 (d, <sup>3</sup>J(H,H)=8Hz, 4H; Har), 7.22 (d, <sup>3</sup>J(H,H)=8Hz, 4H; Har), 4.95 (s, 14H; H1), 3.90-3.23 (m, 108H; H<sub>2</sub>, H<sub>3</sub>, H<sub>4</sub>, H<sub>5</sub>, H<sub>6</sub>, H<sub>6</sub>, CH<sub>2</sub>crown), 2.28 (s, 6H, CH<sub>3</sub>). <sup>13</sup>C NMR (100MHz, D<sub>2</sub>O, 298K):  $\delta$ =160.7 (C=O urea), 141.8 (q), 140.2 (q), 128.9 (CH arom.), 125.4 (CH arom.), 101.9 (C1), 80.8 (C4), 73.0-72.1-72.0-71.9-71.8 (C2, C3, C4, C5) (C2), 70.3 (C6), 60.0 (C6'), 53.0 (CH<sub>2</sub> crown), 41.6 (CH<sub>2</sub> crown), 20.2 (CH<sub>3</sub>). Maldi-TOF [C<sub>116</sub>H<sub>186</sub>N<sub>4</sub>O<sub>82</sub>S<sub>2</sub>Zn: 3074.9 u.m.a.]: 2671.078 [M- Zn(OTs)<sub>2</sub>+H<sup>+</sup>]

### Pseudo-[2]rotaxane 11

[bis- $\beta$ -cyclodextrinyl]-diaz-[18-6]-crown dimer **2** (50mg, 0,019 mmol, M = 2670.44 g.mol<sup>-1</sup>). Cu<sup>II</sup> *p*-tosylate (7,59 mg, 1,87.10<sup>-2</sup> mmol, M=405,93 g.mol<sup>-1</sup>). **11** was obtained quantitatively as a pale green flocculent solid. IR (KBr):  $\nu$  =3300 (OH), 2950 (CH-), 2500 (CHar), 1637 (C=O urea) cm<sup>-1</sup>. <sup>1</sup>H NMR (400MHz, D<sub>2</sub>O, 298K)  $\delta$ =7.61 (d, <sup>3</sup>J(H,H) = 8Hz, 4H; Har), 7.22 (d, <sup>3</sup>J(H,H) = 8Hz, 4H; Har), 4.95 (s, 14H; H1), 3.90-3.23 (m, 108H; H<sub>2</sub>, H<sub>3</sub>, H<sub>4</sub>, H<sub>5</sub>, H<sub>6</sub>, H<sub>6</sub>, CH<sub>2</sub> crown), 2.28 (s, 6H, CH<sub>3</sub>). <sup>13</sup>C NMR (100MHz, D<sub>2</sub>O, 298K):  $\delta$ =160.7 (C=O urea), 141.2 (q), 139.8 (q), 128.4 (CH arom.), 124.9 (CH arom.), 101.4 (C1), 80.4 (C4), 72.6, 72.4, 71.6, 71.5, (C2, C3, C4, C5), 69.8 (C6), 59.5 (C6'), 52.5 (CH<sub>2</sub> crown), 40.7 (CH<sub>2</sub> crown), 20.2 (CH<sub>3</sub>). Maldi-TOF [C<sub>116</sub>H<sub>186</sub>CuN<sub>4</sub>O<sub>82</sub>S<sub>2</sub>: 3073.92 u.m.a.]:

2670.868 [M-Cu(OTs)<sub>2</sub>], 2733.836 [M-Cu(OTs)<sub>2</sub>+Cu]; ESIMS: *m/z* : 1336.4961[M/2+2H<sup>+</sup>],1422.5129[M-Cu(OTs)<sub>2</sub>+Cu+OTs], 1539.5081 [M+3H<sup>+</sup>]

### Pseudo-[2]rotaxane 12

[bis- $\beta$ -cyclodextrinyl]-diaz-[18-6]-crown dimer **2** (25mg, 0,0093 mmol, M = 2670.44 g.mol<sup>-1</sup>). Ca<sup>II</sup>-*p*-tosylate (3.58 mg, 8,78.10<sup>-3</sup> mmol, M=407.78 g.mol<sup>-1</sup>). **12** was obtained quantitatively as an off-white flocculent solid. IR (KBr):  $\nu$  = 3300 (OH), 2950 (CH-), 2500 (CHar), 1637 (C=O urea), cm<sup>-1</sup>. <sup>1</sup>H NMR (400MHz, D<sub>2</sub>O, 298K):  $\delta$ =7.69 (d, <sup>3</sup>J(H,H) = 8Hz, 4H; Har), 7.26 (d, <sup>3</sup>J(H,H) = 8Hz, 4H; Har), 5.00 (s, 14H; H1), 3.99-3.28 (m, 108H H<sub>2</sub>, H<sub>3</sub>, H<sub>4</sub>, H<sub>5</sub>, H<sub>6</sub>, H<sub>6</sub>, CH<sub>2</sub>crown), 2.33 (s, 6H; CH<sub>3</sub>). <sup>13</sup>C NMR (100MHz, D<sub>2</sub>O, 298K):  $\delta$ = 160.7 (C=O urea), 141.8 (q), 140.2 (q), 128.9 (q), 125.4 (q), 101.9 (C1), 80.8 (C4), 73.0, 72.1, 72.0, 71.9, 71.8 (C2, C3, C4, C5) (C2), 70.3 (C6), 60.0 (C6'), 53.0 (CH<sub>2</sub> crown), 41.6 (CH<sub>2</sub> crown), 20.2 (CH<sub>3</sub>). Maldi-TOF [C<sub>116</sub>H<sub>186</sub>CaN<sub>4</sub>O<sub>82</sub>S<sub>2</sub>: 3050.96 u.m.a.]: 2670.40 [M- Ca(OTs)<sub>2</sub>]

### Pseudo-[2]rotaxane 13

[bis- $\beta$ -cyclodextrinyl]-diaz-[18-6]-crown dimer **1** (50mg, 0,019 mmol, M = 2582,33 g.mol<sup>-1</sup>). Zn<sup>II</sup> bis-sulfanilate (8.6 mg, 1,93.10<sup>-2</sup> mmol, M=445.8 g.mol<sup>-1</sup>) **13** was obtained quantitatively as a white solid. IR (KBr):  $\nu$  = 3300 (OH), 2950 (CH-), 2500 (CHar), 1637 (C=O urea) cm<sup>-1</sup>. <sup>1</sup>H NMR (400MHz, D<sub>2</sub>O, 298K):  $\delta$ =7.51 (d, <sup>3</sup>J (H,H) = 8Hz, 4H; Har), 6.78 (d, <sup>3</sup>J (H,H) = 8Hz, 4H; Har), 5.32 (s, 2H; H1), 5.15 (d, <sup>3</sup>J (H,H) = 4Hz, 1H; CH<sub>2</sub> crown), 4.98 (bs, 12 H; H1), 4.57 (d, <sup>3</sup>J (H,H) = 8Hz, 1H; CH<sub>2</sub> crown), 4.51-3.92 (m, 4H; CH<sub>2</sub> crown), 3.91-3.39 (m, 86H; H<sub>2</sub>, H<sub>3</sub>, H<sub>4</sub>, H<sub>5</sub>, H<sub>6</sub>, H<sub>6</sub>, CH<sub>2</sub> crown), 3.40-3.11 (m, 5H, CH<sub>2</sub> crown). <sup>13</sup>C NMR (100MHz, D<sub>2</sub>O, 298K):  $\delta$ =160.6 (C=O urea), 142.0 (q), 140.0 (q), 129.1(CH arom.), 125.3 (CH arom.), 101.9 (C1), 99.5 (C1), 95.8 (CH<sub>2</sub> crown), 92.0 (CH<sub>2</sub> crown), 83.3 (CH<sub>2</sub> crown), 76.6 (CH<sub>2</sub> crown), 75.9, 73.2, 71.8 (C2, C3, C5), 69.6 (C6) 65.0 (CH<sub>2</sub> crown), 62.5 (CH<sub>2</sub> crown), 60.4 (C6'), 48.6 (CH<sub>2</sub> crown), 44.6 (CH<sub>2</sub> crown), 34.5 (CH<sub>2</sub> crown). Maldi-TOF [C<sub>110</sub>H<sub>176</sub>N<sub>6</sub>O<sub>80</sub>S<sub>2</sub>Zn: 2988.86u.m.a.]: 2583.048 [M- Zn(NH<sub>2</sub>PhSO<sub>3</sub>)<sub>2</sub>+H<sup>+</sup>]

### Pseudo-[2]rotaxane 14

[bis- $\beta$ -cyclodextrinyl]-diaz-[18-6]-crown dimer **1** (50mg, 0,019 mmol, M = 2582,33 g.mol<sup>-1</sup>). Ca<sup>II</sup> bis-sulfanilate (7.65 mg, 1,94.10<sup>-2</sup> mmol, M=395 g.mol<sup>-1</sup>). **14** was obtained quantitatively as a white solid. IR (KBr):  $\nu$  =3300 (OH), 2950 (CH-), 2500 (CH arom.), 1637 (C=O urea) cm<sup>-1</sup>. <sup>1</sup>H NMR (400MHz, D<sub>2</sub>O, 298K):  $\delta$ =7.51 (d, <sup>3</sup>J (H,H) = 8Hz, 4H; CH arom.), 6.78 (d, <sup>3</sup>J(H,H) = 8Hz, 4H; Har), 5.32 (s, 2H; H1), 5.15 (d, <sup>3</sup>J(H,H) = 4Hz, 1H; CH<sub>2</sub> crown), 4.98 (bs, 12 H; H1), 4.57 (d, <sup>3</sup>J (H,H) = 8Hz, 1H; CH<sub>2</sub> crown), 4.51-3.92 (m, 4H; CH<sub>2</sub> crown), 3.91-3.39 (m, 86H; H<sub>2</sub>, H<sub>3</sub>, H<sub>4</sub>, H<sub>5</sub>, H<sub>6</sub>, H<sub>6</sub>, CH<sub>2</sub> crown), 3.40-3.11 (m, 5H; CH<sub>2</sub> crown). <sup>13</sup>C NMR (100MHz, D<sub>2</sub>O, 298K)  $\delta$ =160.6 (CO urea), 142.0 (q) 140.0 (q), 129.1(CH arom.), 125.3 (CH arom.), 101.9 (C1), 99.5 (C1), 95.8 (CH<sub>2</sub> crown), 92.0 (CH<sub>2</sub> crown), 83.3 (CH<sub>2</sub> crown), 76.6 (CH<sub>2</sub> crown), 75.9, 73.2, 71.8 (C2, C3, C5), 69.6 (C6) 65.0 (CH<sub>2</sub> crown), 62.5 (CH<sub>2</sub> crown), 60.4 (C6'), 48.6 (CH<sub>2</sub> crown), 44.6 (CH<sub>2</sub> crown), 34.5 (CH<sub>2</sub> crown). Maldi-TOF [C<sub>110</sub>H<sub>176</sub>CaN<sub>6</sub>O<sub>80</sub>S<sub>2</sub>: 2964.90 u.m.a.]: 2583.119[M- Ca(NH<sub>2</sub>PhSO<sub>3</sub>)<sub>2</sub>+H<sup>+</sup>]

### Pseudo-rotaxane 15

Bis-triazolo- $\beta$ -cyclodextrinyl-diaz-[18-6]-crown dimer **3** (20mg, 0,0075 mmol, M = 2658.44 g.mol<sup>-1</sup>). Zn<sup>II</sup> bis-sulfanilate (3.35 mg, 7,51.10<sup>-3</sup> mmol, M=445.8 g.mol<sup>-1</sup>) in water, was obtained quantitatively as a white solid. IR (KBr):  $\nu$  =3300 (OH) 2950 (CH-) 2500 (CH arom.), 1637 (C=O urea) cm<sup>-1</sup>. <sup>1</sup>H NMR (400MHz, D<sub>2</sub>O, 298K):  $\delta$ =8.13 (s, 2H; TriazolH), 7.51 (d, <sup>3</sup>J (H,H)=8Hz, 4H; Har), 6.77 (d, <sup>3</sup>J (H,H)=8Hz, 4H; Har), 5.09 (s, 2H; CH<sub>2</sub> crown), 4.99 (s,14H; H<sub>1</sub>), 4.92 (b s, 3; CH<sub>2</sub> crown), 4.61 (m, 2H; CH<sub>2</sub> crown), 4.10 (m; CH<sub>2</sub> crown), 3.88-3.38 (m, 84H;

H<sub>2</sub>, H<sub>3</sub>, H<sub>4</sub>, H<sub>5</sub>, H<sub>6</sub>, H<sub>6</sub>'), 3.14-3.08 (m; CH<sub>2</sub> crown), 3.10-3.00 (m; CH<sub>2</sub> crown), 2.91-2.82 (m; CH<sub>2</sub> crown), 2.90 (s, 4H; CH<sub>2</sub> triazol). <sup>13</sup>C NMR (100MHz, D<sub>2</sub>O, 298K): δ=132.6 (CH arom.), 126.9 (CH<sub>2</sub> triazol), 124.8 (CH arom.), 101.8 (C1), 81.1 (C4), 73.1-72.1-71.8 (C2, C3, C5), 69.6 (C6), 60.2 (C6'), 52.4 (CH<sub>2</sub> triazol), 51.2 (CH<sub>2</sub> crown), 42.9 (CH<sub>2</sub> triazol), 44.7 (CH<sub>2</sub> crown), 22.1 (CH<sub>2</sub> crown). Maldi-TOF [C<sub>114</sub>H<sub>180</sub>N<sub>10</sub>O<sub>78</sub>S<sub>2</sub>Zn: 3064.92 u.m.a.]: 1330.99 [M- Zn(NH<sub>2</sub>PhSO<sub>3</sub>)<sub>2</sub>+2H<sup>+</sup>]

### 3. NMR Spectra

Pseudo-[2]rotaxane **11** 2D NMR (ROESY)

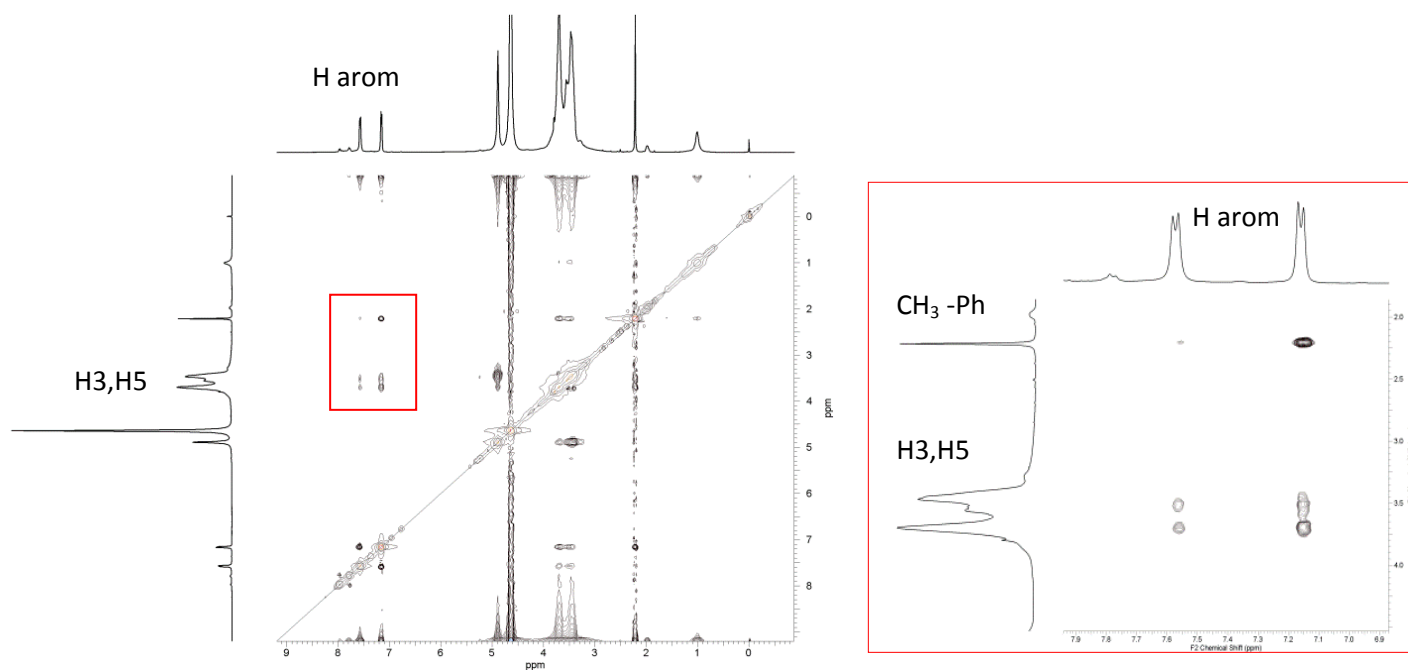

Pseudo-[2]rotaxane **15** 2D NMR (ROESY)

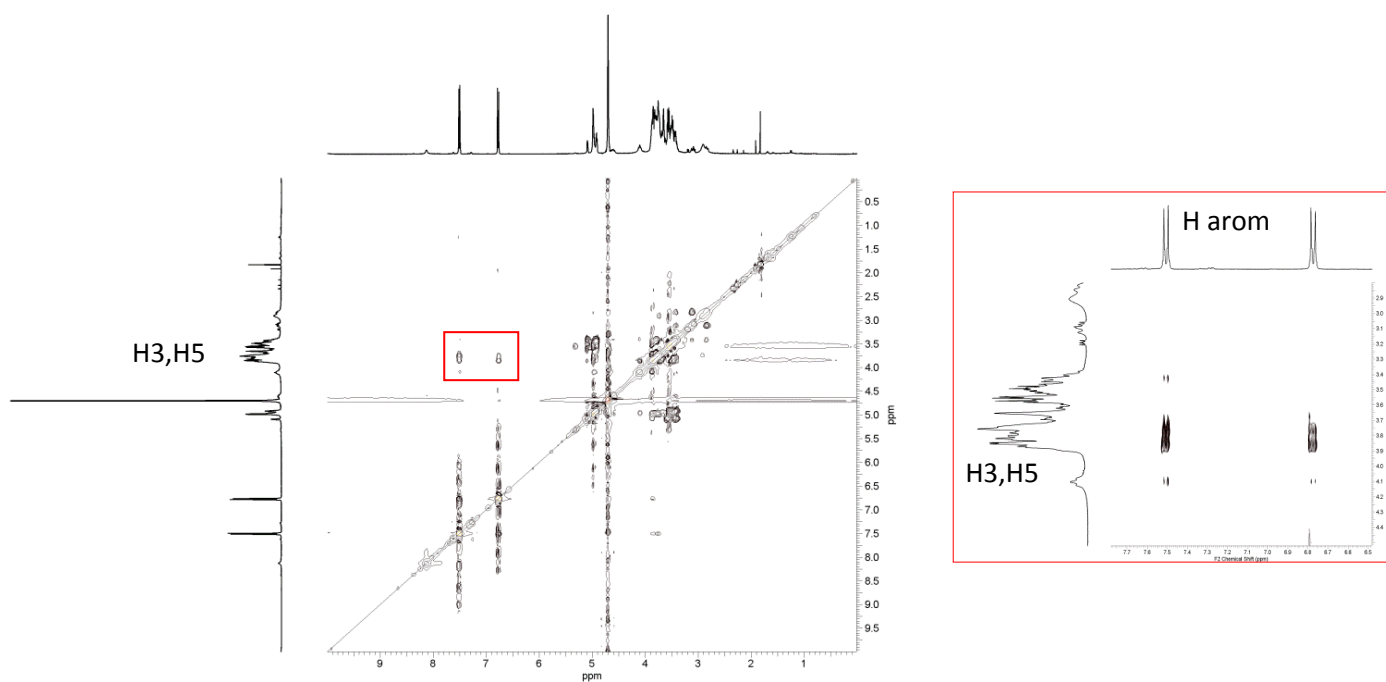

## **<sup>13</sup>C NMR SPECTRA**

### **Pseudorotaxane 7 :**

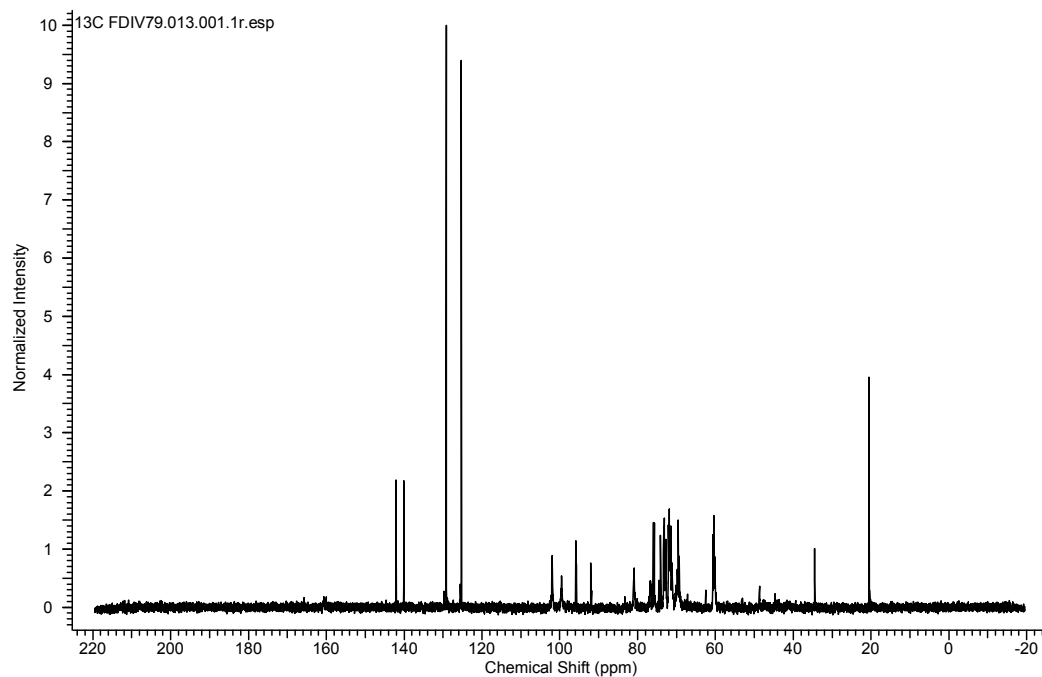

### **Pseudorotaxane 8**

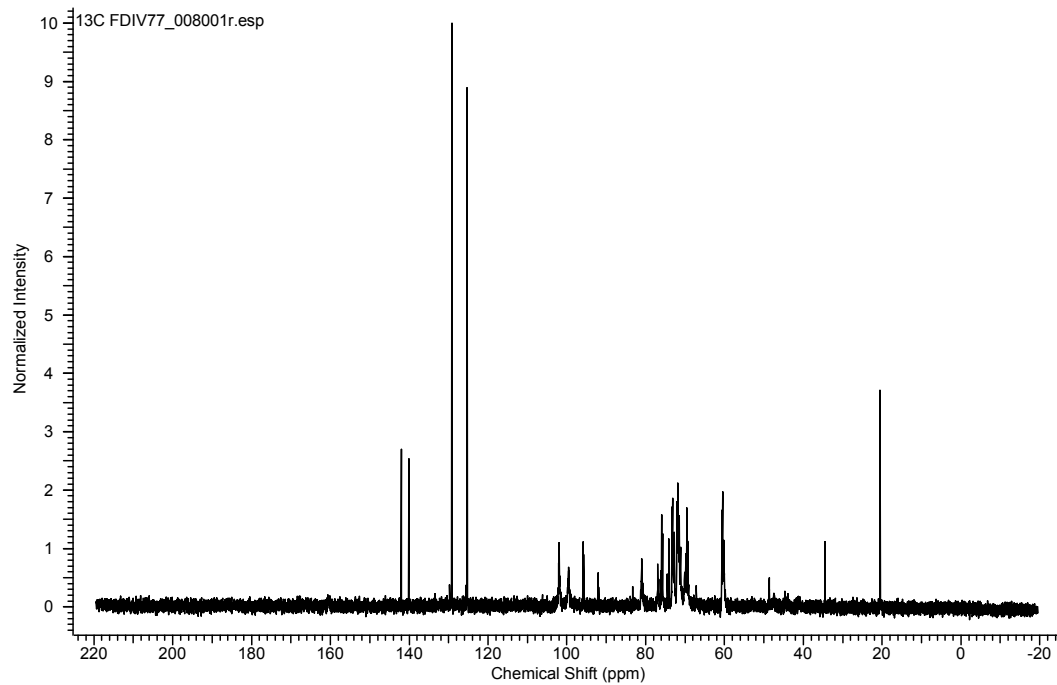

### Pseudorotaxane 9 :

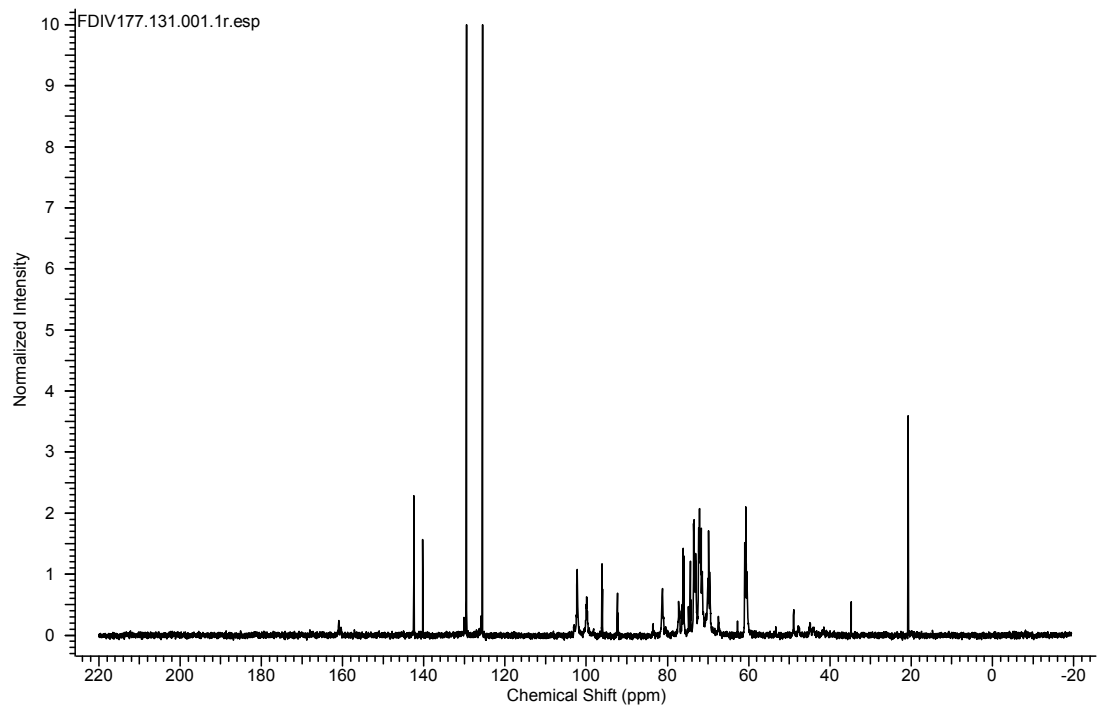

### Pseudorotaxane 10:

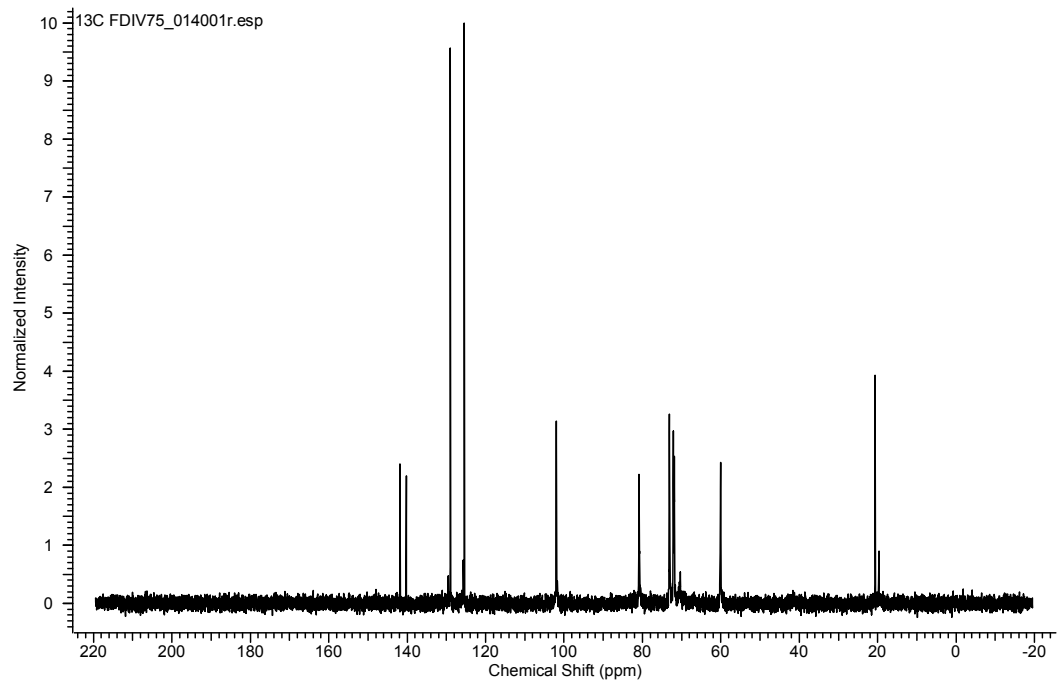

### Pseudorotaxane 11 :

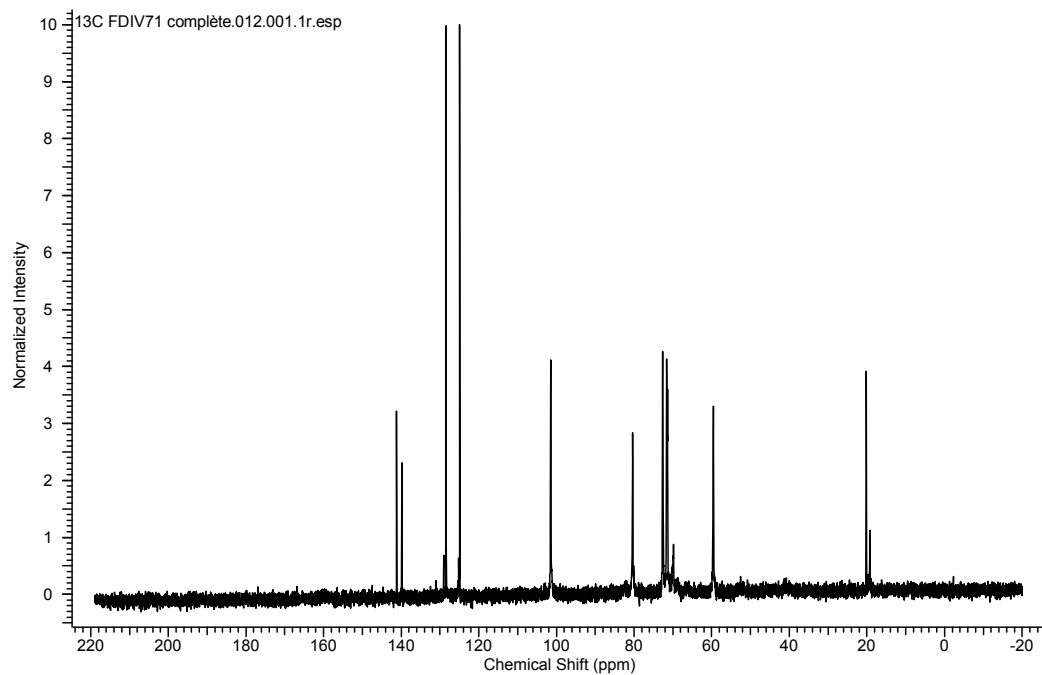

### Pseudorotaxane 12:

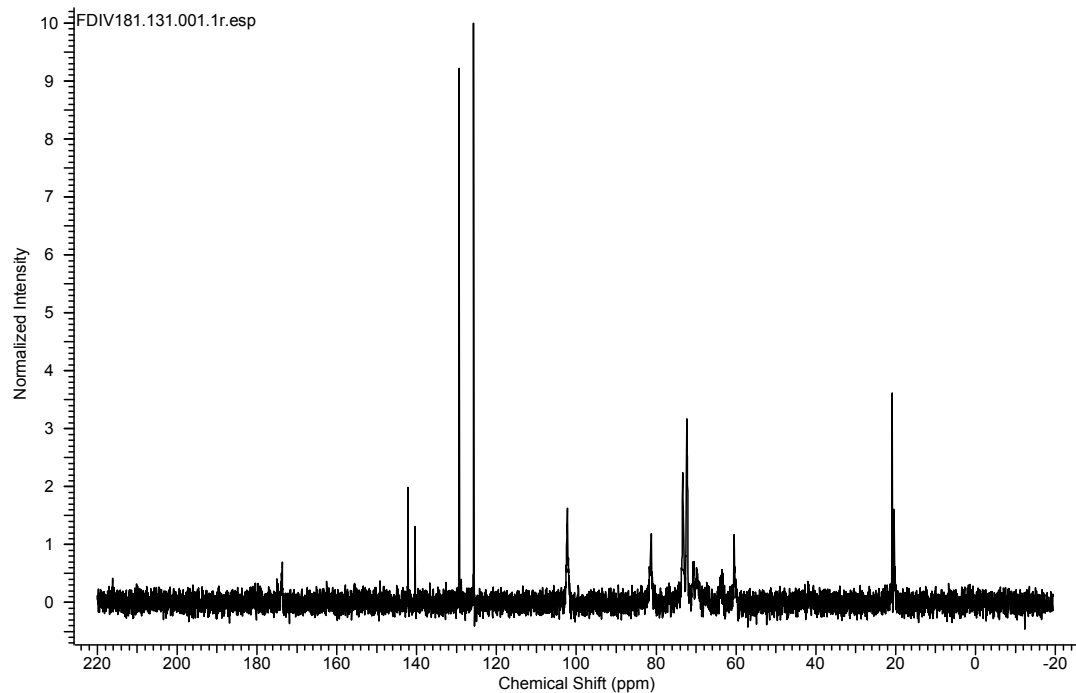

### Pseudorotaxane 13:

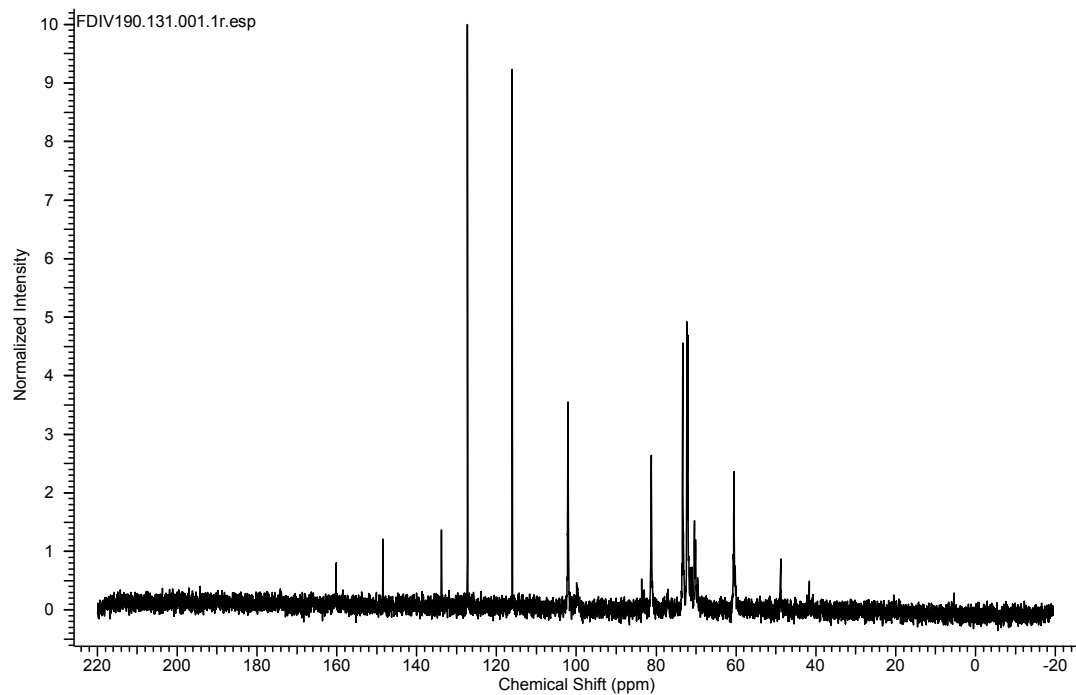

### Pseudorotaxane 14:

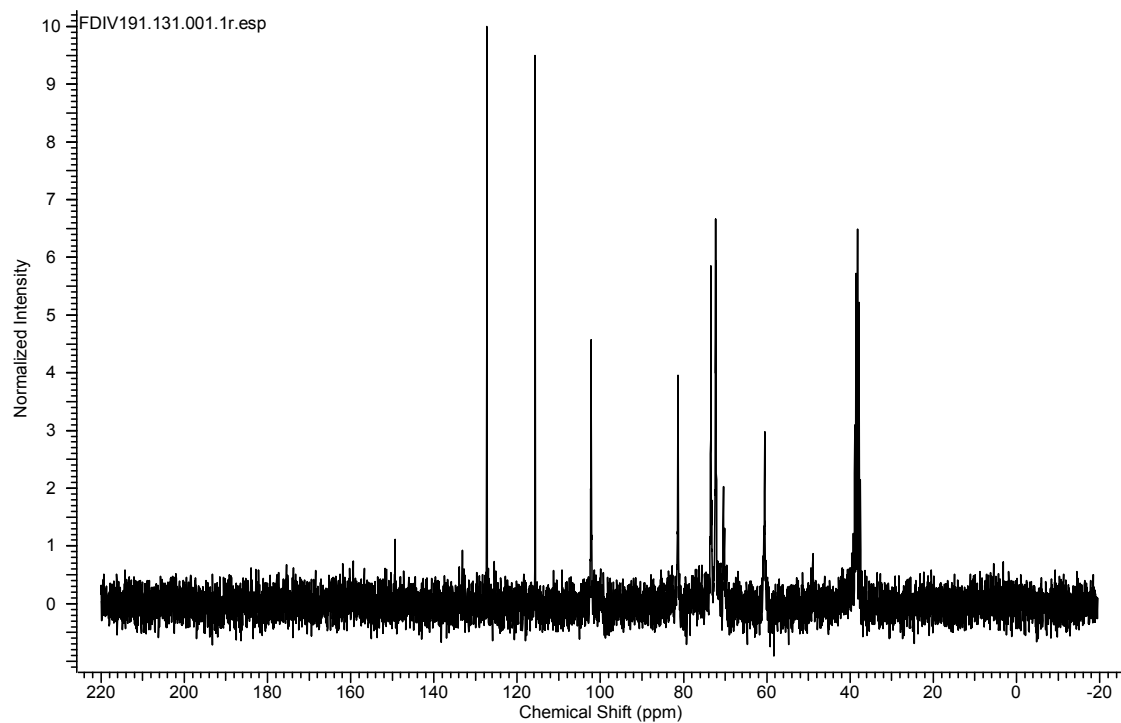

## Job plots of pseudo[2]rotaxanes 7 to 15

NB : job plots of 11 and 12 : are not given because of less amount of starting the chiral dimer 2 material.

### Pseudo[2]rotaxane 7

Variation of CD H<sub>3</sub> protons

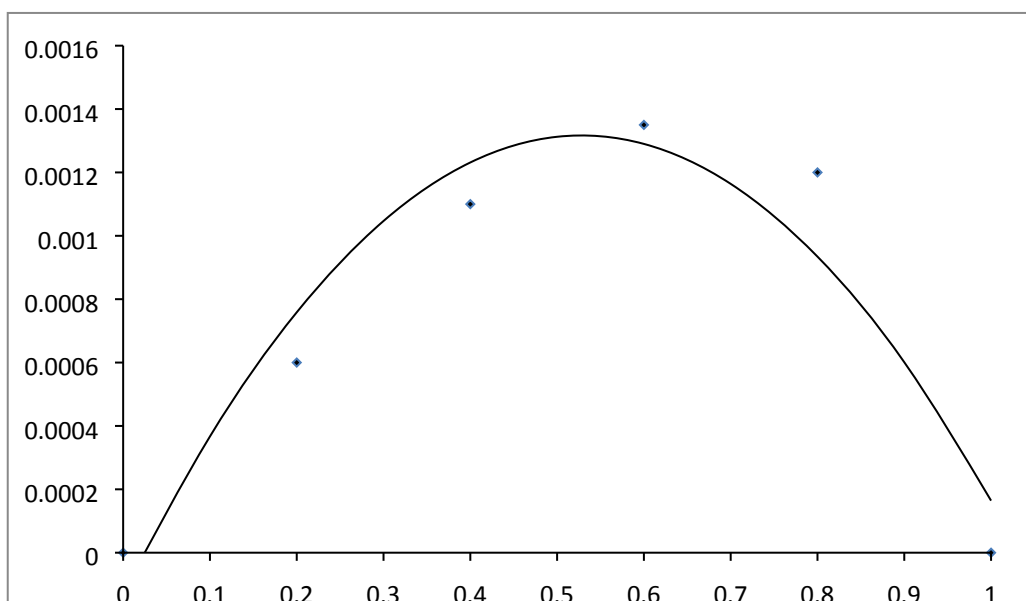

Variation of tosylate aromatic protons

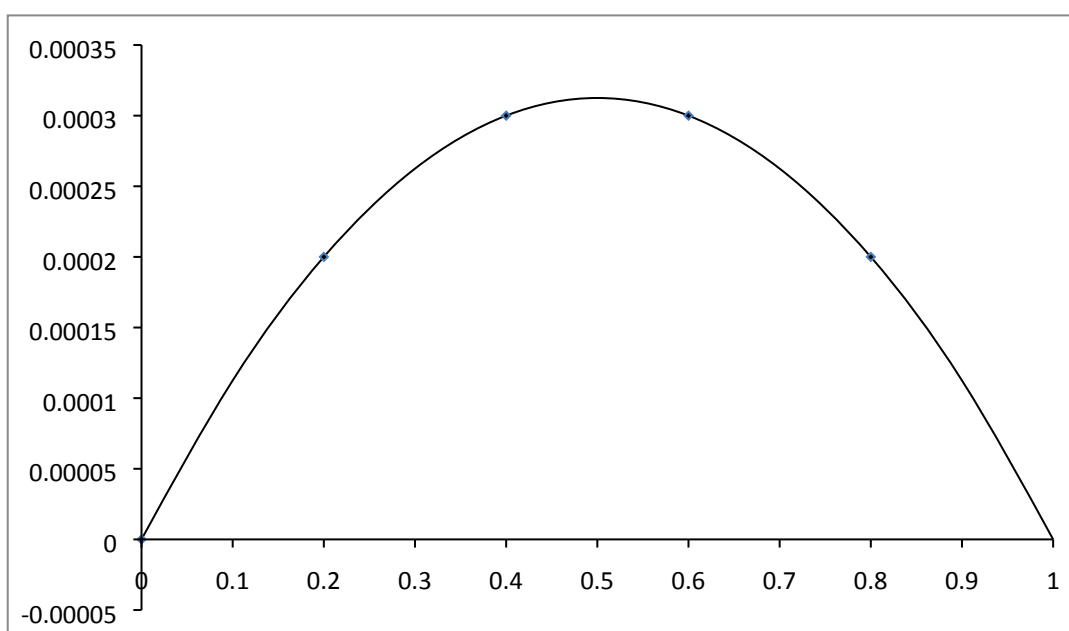



### Pseudo[2]rotaxane 8 :

Variation of CD H<sub>3</sub> protons

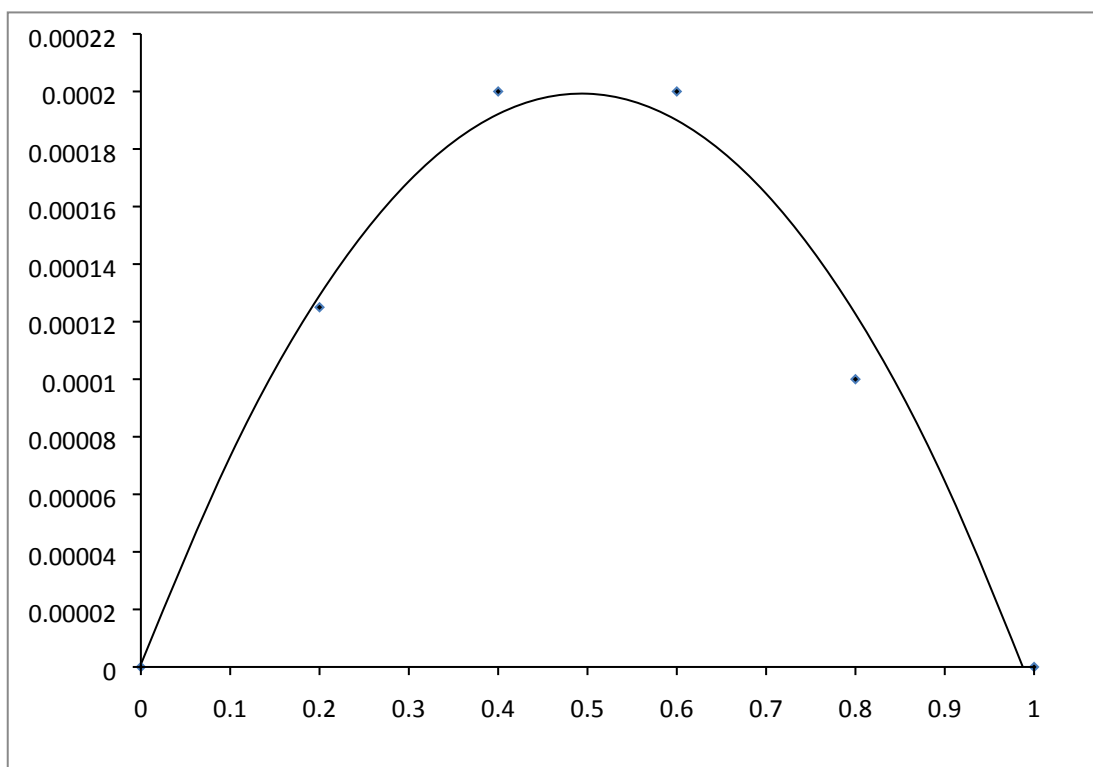

Variation of tosylate aromatic protons

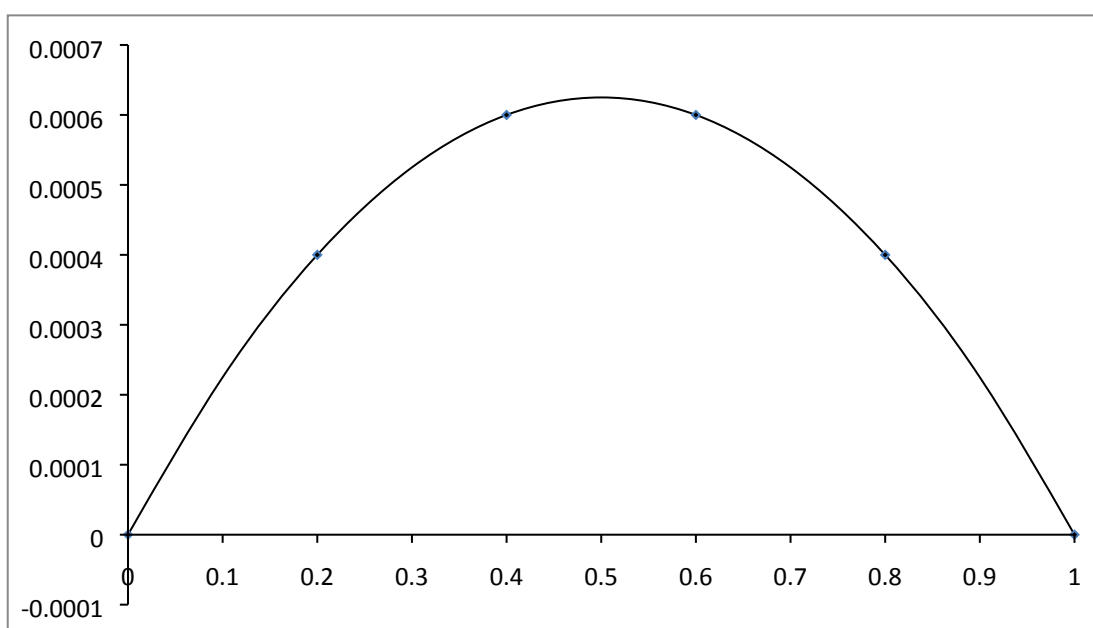

### Pseudo[2]rotaxane 9 :

Variation of CD H<sub>3</sub> protons

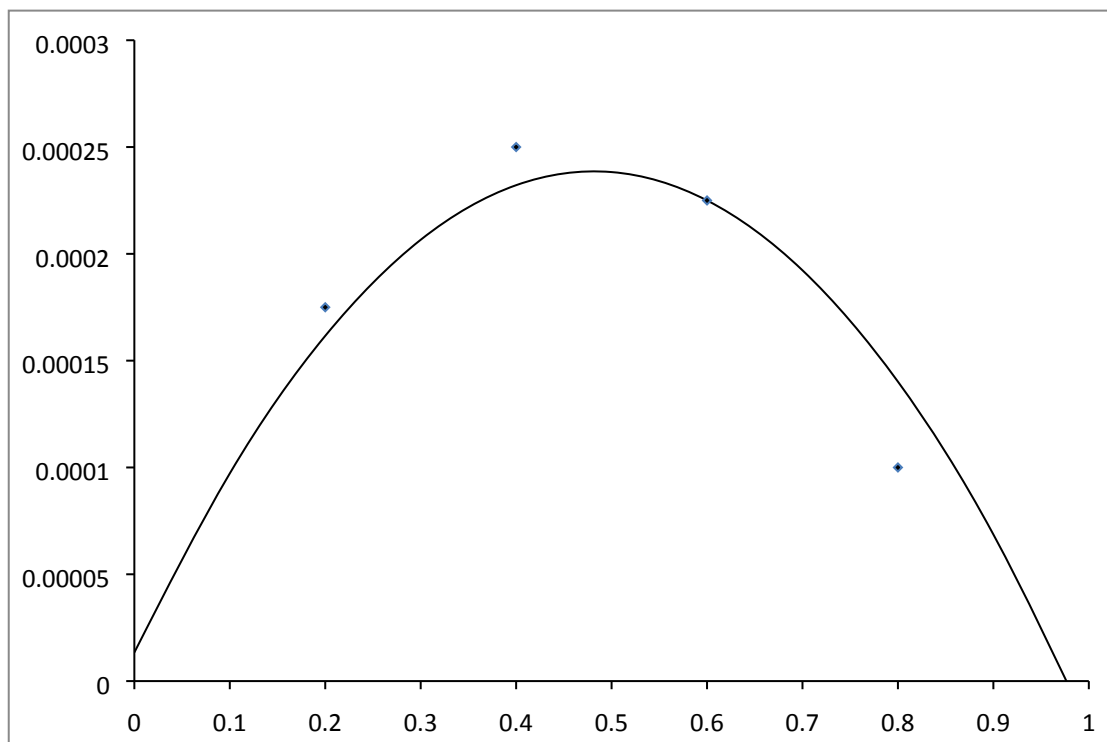

Variation of tosylate aromatic protons

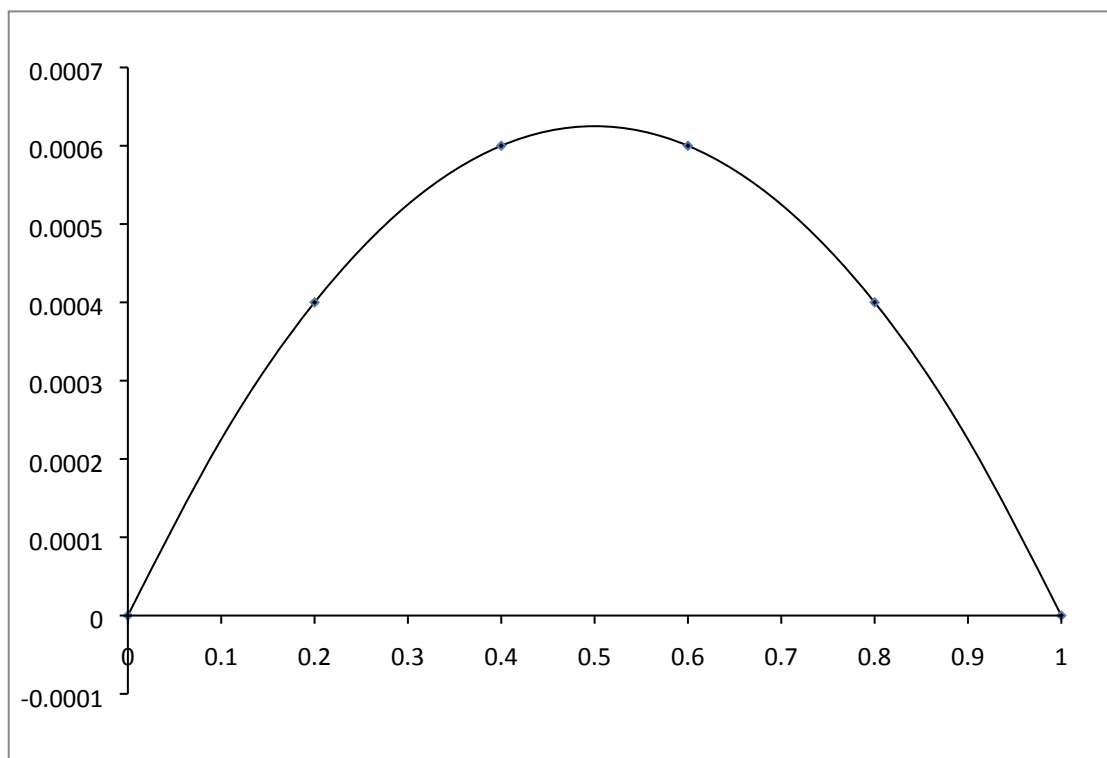

## Pseudo[2]rotaxane 10 :

Variation of tosylate aromatic protons

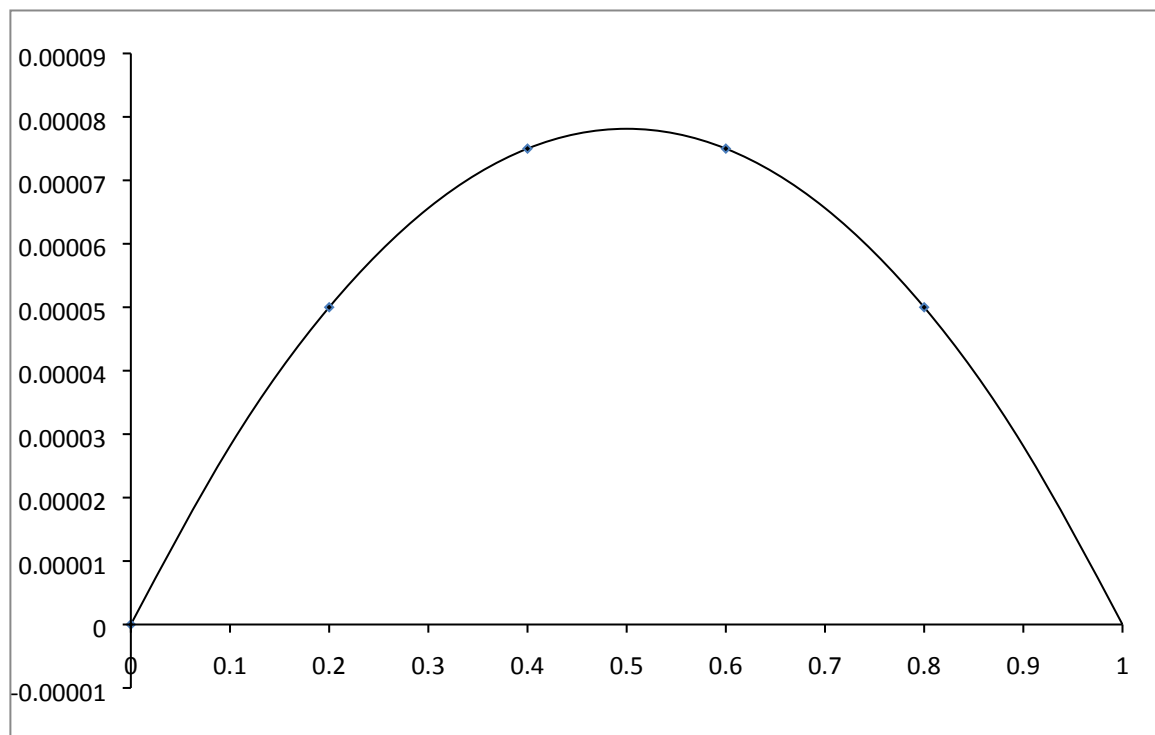

Variation of CD H<sub>3</sub> protons

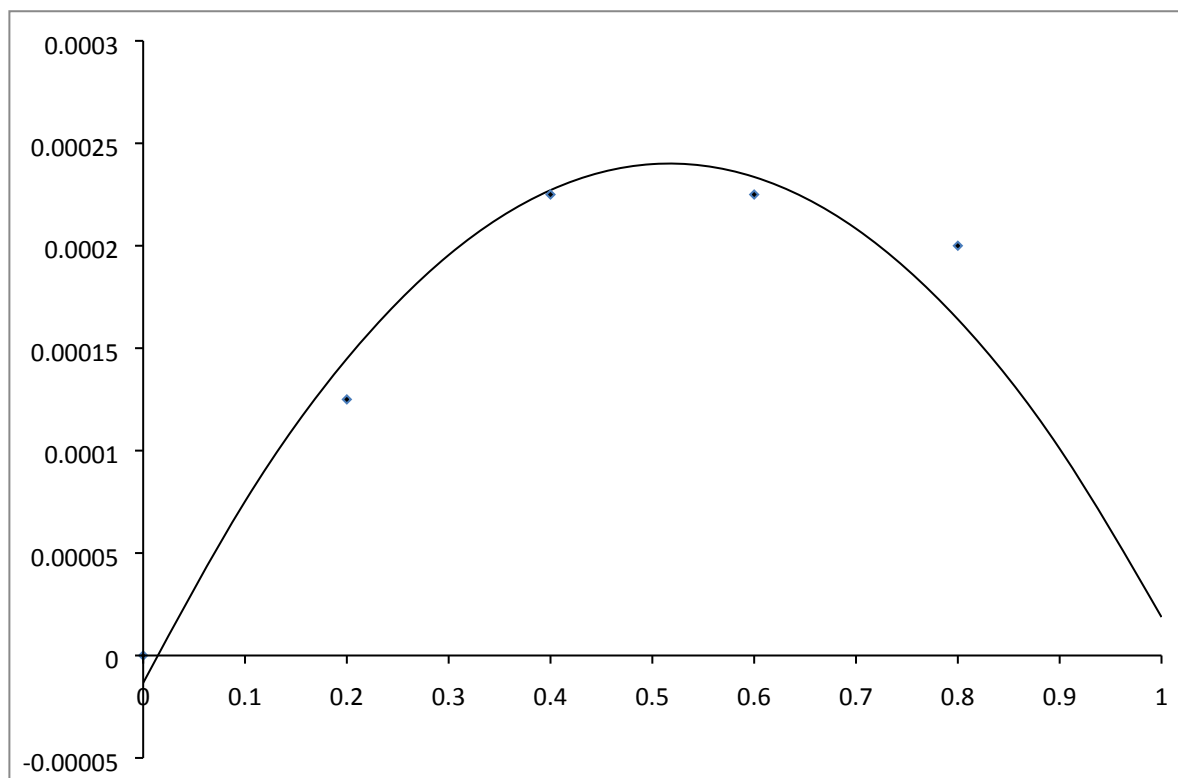

**pseudorotaxane 13** Titration of **13** with Zn<sup>II</sup> bisulfanilate

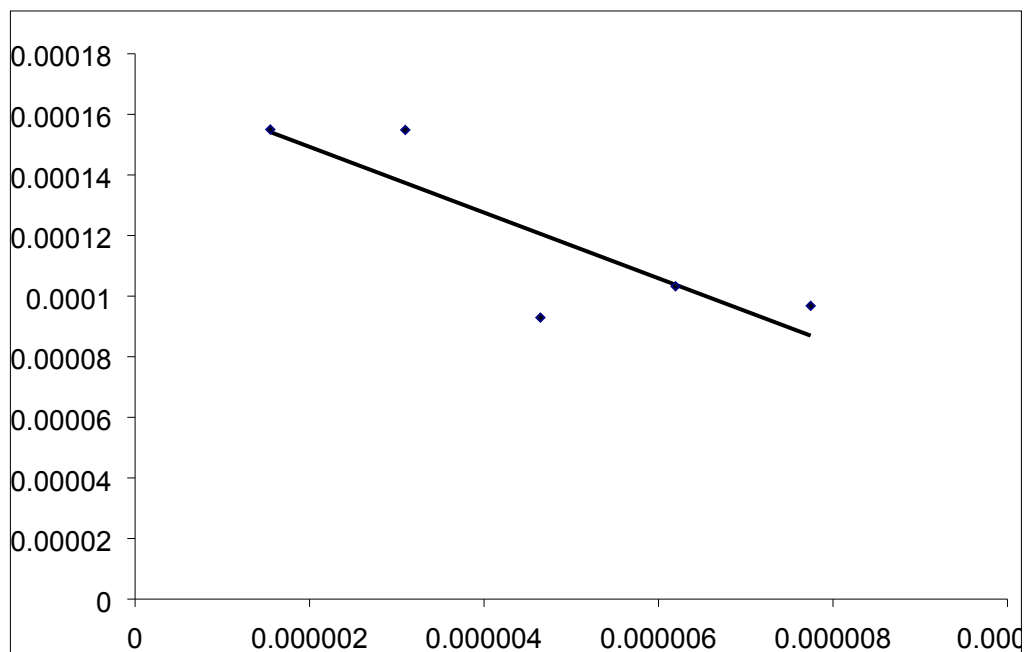

|         | 1 sur    | Ka       |
|---------|----------|----------|
| pente   | 10.848   | 0.092183 |
| ord ori | 2.00E-04 | 5000     |
|         |          | 54240    |

**Ka = 54240 M<sup>-1</sup>**

Variation of sulfanilate aromatic protons

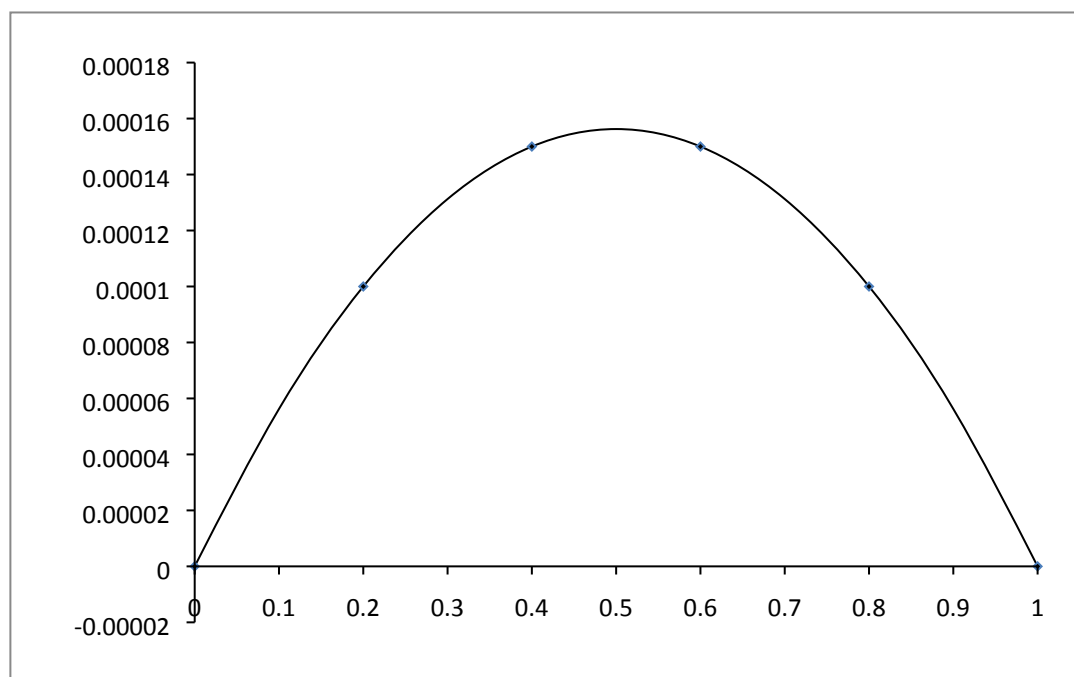

### Pseudo[2]rotaxane 14 :

Variation of CD H<sub>3</sub> protons

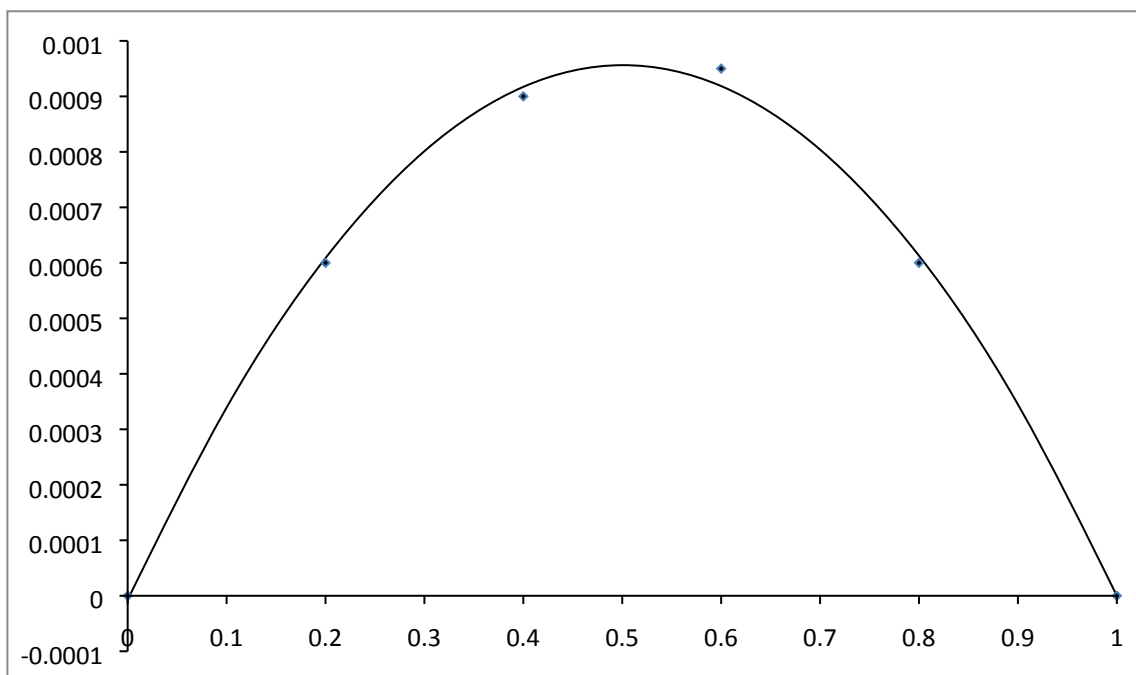

Variation of sulfanilate aromatic protons

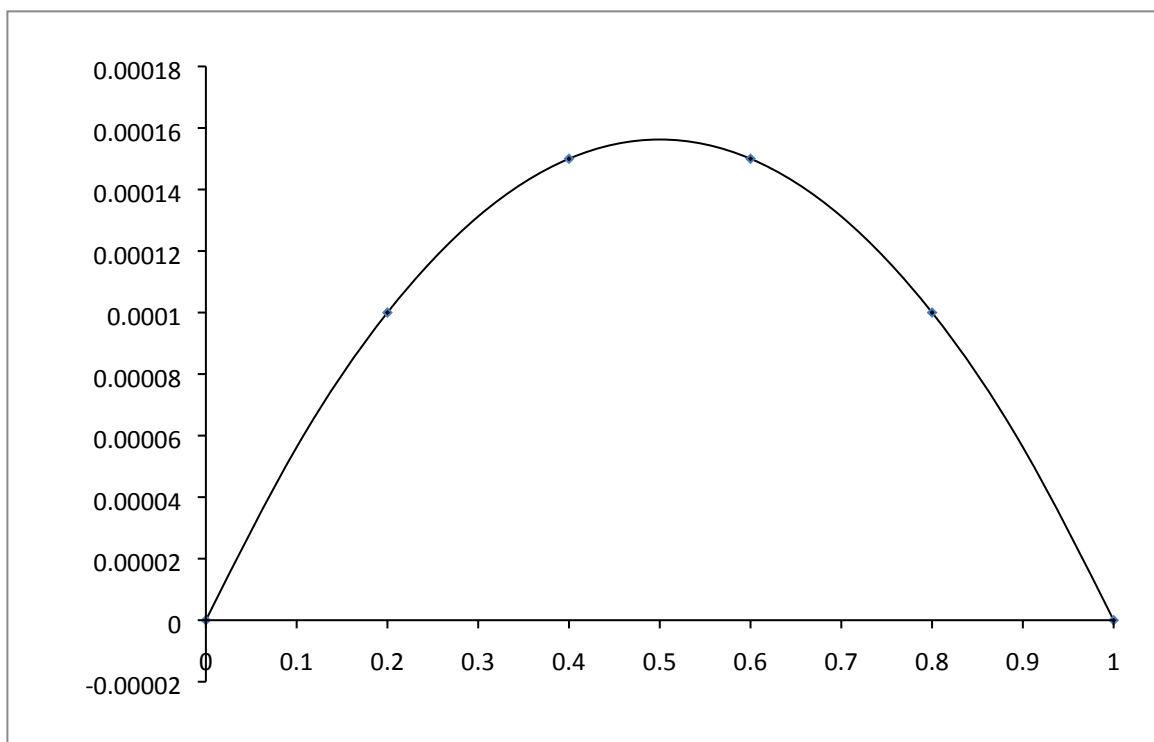

**Pseudo[2]rotaxane 15 : Titration of 15 with Zn<sup>II</sup> bisulfanilate**

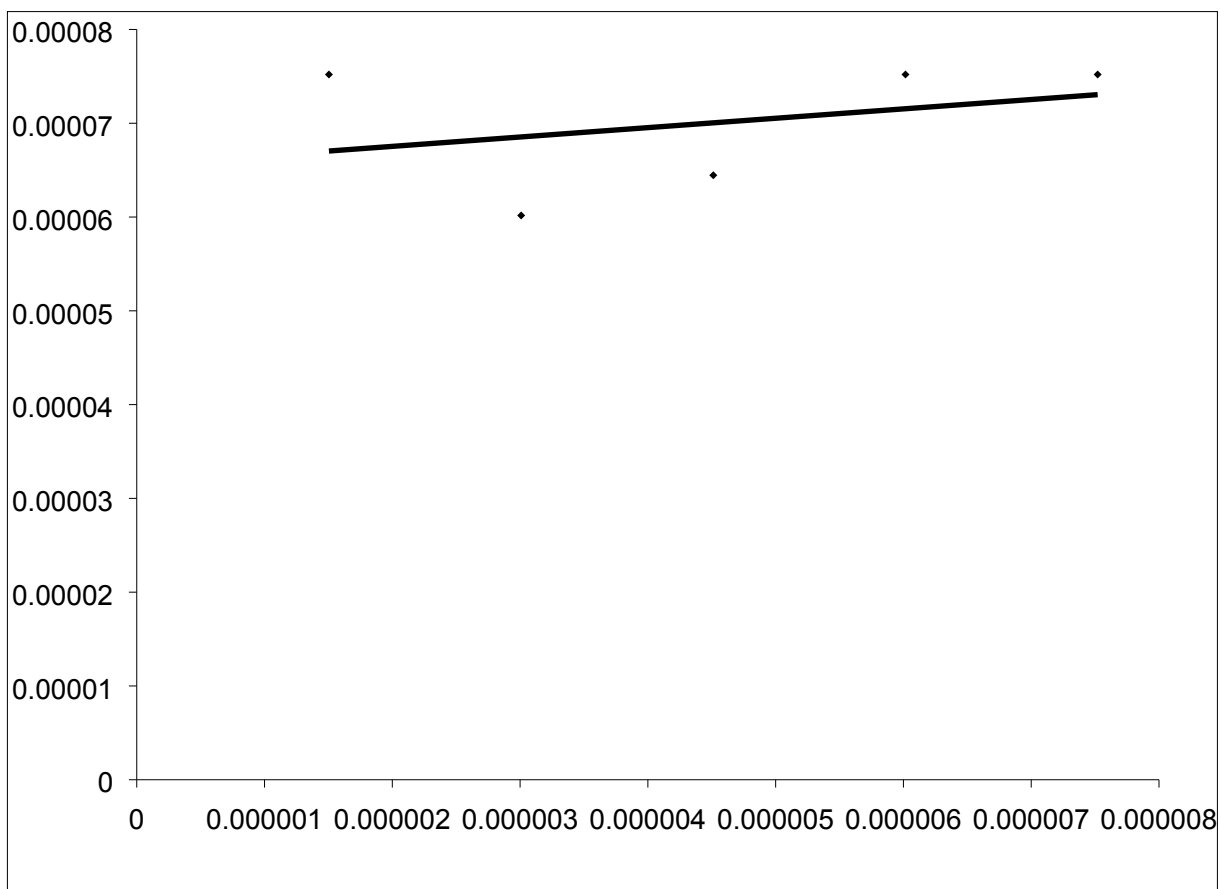

:

|         | 1 sur    | Ka                |
|---------|----------|-------------------|
| pende   | 0.9993   | 1.0007            |
| ord ori | 7.00E-05 | 14285.71 14275.71 |

**Ka = 14276 M<sup>-1</sup>**

## References

- 6 S. Menuel, J.-P. Joly, B. Courcot, J. Elysée, N. E. Ghermani and A. Marsura, *Tetrahedron*, 2007, **63**, 1706-1714.
- 7 S. Porvanski, F. Dumarcay-Charbonnier, S. Menuel, V. Bulach, J.-P. Joly and A. Marsura, *Tetrahedron*, 2009, **65**, 6196-6203.
- 8 Xu-Jie, Yang, X. Wang, D.-Y. Chen, J. Yang, L.-D. Lu, X.-Q. Sun, G.-Y. He and J. Chen, *J. of Applied Polymer Science*, 2000, **77**, 2363-2369.
